# Supplementary material
Source: PubMed Central journal article supplement (PMC6132273)
Supplement: NIHMS925027-supplement-supplement_1.pdf [file NIHMS925027-supplement-supplement_1.pdf]

### Supplemental Materials

#### Study 1 Measures

##### **Measures of Psychopathology**

*Brief Symptom Inventory (BSI; Derogatis & Melisaratos, 1983)*. The BSI includes 49 items assessing eight forms of psychopathology. Items were rated on a scale from 1 (*not at all*) to 5 (*extremely*). Participants were instructed to describe themselves over the past 7 days. Items were summed for eight total scores: Psychoticism ( $\alpha = .84$ ), Somatization ( $\alpha = .88$ ), Depression ( $\alpha = .93$ ), Hostility ( $\alpha = .86$ ), Phobia ( $\alpha = .88$ ), Obsessive-Compulsive ( $\alpha = .92$ ), Anxiety ( $\alpha = .91$ ), and Paranoia ( $\alpha = .89$ ).

*Alcohol Use Disorders Identification Test (Saunders, Aasland, Babor, De la Fuente, & Grant, 1993)*. The AUDIT consists of 10 items that assess frequency and amount of alcohol use, and alcohol-related problems such as functional impairment, guilt, blackouts, and injury. Items were rated on three- and five-point scales, and summed for a total score of alcohol use disorder symptoms. Internal consistency of the items was  $\alpha = .90$ .

*Severity of Dependence Scale (SDS; Martin, Copeland, Gates, & Gilmour, 2006)*. Five items were administered assessing cannabis use over the past three months, rated on a scale ranging from 0 (*never or almost never/ not at all/not difficult*) to 3 (*always/ a great deal/impossible*). Internal consistency of the items was  $\alpha = .89$ . Items were summed for a total score of cannabis dependence.

*Drug Abuse Screening Test (DAST; McCabe, Boyd, Cranford, Morales, & Slayden, 2006)*. The DAST consists of 10 items that assess general non-alcohol drug use across the past one year,

## GENERAL FACTORS

22

rated from 1 (*not at all*) to 5 (*all the time*). Items were summed for a total score, for which internal consistency was  $\alpha = .88$ .

*Fagerström Test for Nicotine Dependence (FTND; Heatherton, Kozlowski, Frecker, & Fagerström, 1991)*. The FTND consists of six items rated on four-point or dichotomous *yes/no* scales that assess cigarette smoking (e.g., number of cigarettes smoked per day; length of time after having first cigarette in the morning). Items were summed for a total score. Internal consistency of the items was  $\alpha = .72$ .

*Multi-Source Assessment of Personality Pathology - Antisocial Personality Scale (MAPP; Oltmanns & Turkheimer, 2006)*. The MAPP antisocial personality disorder scale is a 10-item self-report measure of the diagnostic criteria for the DSM-IV-TR antisocial personality disorder criteria. Items are phrased in layman's language, and rated on a scale from 0 (*I am never like this*) to 4 (*I am always like this*). Items were summed for a total score, for which internal consistency was  $\alpha = .87$ .

*State-Trait Anxiety Inventory, Trait version (STAI; Bieling, Antony, & Swinson, 1998)*. The STAI trait version consists of seven items assessing anxiety and worry. Items were rated on a four-point scale from 1 (*almost never*) to 4 (*almost always*). Items were summed for a total score. Internal consistency of the items was  $\alpha = .92$ .

*Fear Questionnaire (Marks & Matthews, 1979)*. 15 items were used to assess fear levels associated with various situations (e.g., injections, crowded shops, criticism, or open spaces). Items were rated on a scale from 0 (*would not avoid it*) to 8 (*always avoid it*), and were summed for a total score. Internal consistency of the items was  $\alpha = .87$ .

*Internal State Scale (ISS; Bauer et al., 1991)*. 12 items were used to assess symptoms of mania (e.g., feeling overactive, restless, and argumentative). They were rated on a 5-point scale from 1 (*not at all*) to 5 (*all the time*). Items were summed for a total score, for which internal consistency was  $\alpha = .92$ .

*Peters et al. Delusions Inventory (PDI; Peters, Joseph, & Garety, 1999)*. The PDI-21 consists of 21 items that assess preoccupation with and conviction in delusional beliefs. Items were rated on a scale from 1 (*not at all*) to 5 (*all the time*), and summed for a total score. Internal consistency of the items was  $\alpha = .93$ .

### **Measures of Personality**

*International Personality Item Pool-NEO-120 (IPIP-NEO-120; Maples, Guan, Carter, & Miller, 2014)*. The IPIP-NEO-120 is a 120-item short version of the 300-item IPIP-NEO (Goldberg, 1999) that measures the 30 facets of the FFM. It was developed using item-response theory to identify the items that provided the most information about personality. Items were rated on a scale from 1 (*strongly disagree*) to 5 (*strongly agree*), and were summed for 30 facet scores and five domain scores. For the facet scores, coefficient  $\alpha$  ranged from .66 (Dutifulness) to .88 (Depression), with a median of .76. For the domain scores, coefficient  $\alpha$  ranged from .84 (Openness) to .92 (Neuroticism), with a median of .89.

*Big Five Inventory (BFI; Benet-Martinez & John, 1998)*. The BFI is a 44-item assessment of normal personality traits from the FFM. Eight-to-ten items contribute to total scores for each domain. Items are rated on a Likert type scale from 1 (*strongly disagree*) to 5 (*strongly agree*). Coefficient  $\alpha$  ranged from .82 (Agreeableness) to .87 (Neuroticism), with a median of .86.

### **Measures of Personality Disorder**

*PID-5 (Krueger et al., 2012)*. The PID-5 is a 220-item self-report questionnaire that was developed to assess the five proposed domains of maladaptive personality traits of the alternative model of personality disorder included in DSM-5 Section III: Emerging Measures and Models. The items were rated on a scale from 1 (*very false or often false*) to 4 (*very true or often true*), and summed for 30 total scores (five domain-level scores and 25 facet-level scores). Five maladaptive personality domains are assessed: Negative Affectivity ( $\alpha = .94$ ), Detachment ( $\alpha = .93$ ), Antagonism ( $\alpha = .94$ ), Disinhibition ( $\alpha = .94$ ), and Psychoticism ( $\alpha = .97$ ). Internal consistency for the facet scales ranged from  $\alpha = .73$  (Suspiciousness) to  $\alpha = .96$  (Eccentricity), with a median of .89.

*Five-Factor Form (FFF; Rojas & Widiger, 2014)*. The FFF is a 30-item questionnaire that assesses maladaptive variants of 30 facets of the FFM. Items are rated on a scale from 1 to 5. Each item includes a maladaptive low, normal-range, and maladaptive high variants of each facet. Items from each FFM domain were summed to create five domain scores. Coefficient  $\alpha$  ranged from .69 (Agreeableness) to .77 (Conscientiousness), with a median of .73.

### **Missing Data**

For all measures in Study 1, missing data were imputed with the expectation maximization (EM) procedure. EM has been shown to create estimates of population parameters that are more accurate than substitution of mean values (Enders, 2006).

Table 1. *Study 1 Scale Descriptive Statistics.*

|                        | Mean  | Std.<br>Deviation | Skewness | Kurtosis |
|------------------------|-------|-------------------|----------|----------|
| IPIP Neuroticism       | 73.55 | 16.75             | -0.10    | -0.22    |
| IPIP Extraversion      | 71.04 | 14.64             | -0.05    | 0.02     |
| IPIP Openness          | 80.62 | 13.38             | 0.25     | -0.48    |
| IPIP Agreeableness     | 85.96 | 12.51             | 0.03     | -0.50    |
| IPIP Conscientiousness | 83.21 | 14.28             | 0.05     | -0.37    |
| BFI Extraversion       | 21.77 | 7.13              | 0.23     | -0.48    |
| BFI Agreeableness      | 32.22 | 6.55              | -0.19    | -0.05    |
| BFI Conscientiousness  | 31.73 | 7.14              | -0.18    | -0.42    |
| BFI Neuroticism        | 26.32 | 7.15              | -0.17    | -0.53    |
| BFI Openness           | 34.62 | 7.88              | -0.43    | 0.18     |
| FFF Neuroticism        | 19.57 | 4.20              | 0.07     | -0.49    |
| FFF Extraversion       | 17.85 | 4.03              | -0.10    | -0.14    |
| FFF Openness           | 20.00 | 3.82              | -0.48    | 0.39     |
| FFF Agreeableness      | 20.63 | 3.59              | -0.71    | 0.76     |
| FFF Conscientiousness  | 20.47 | 3.99              | -0.87    | 0.65     |
| PID5 Negative Affect   | 54.68 | 15.79             | 0.00     | -0.73    |
| PID5 Detachment        | 56.53 | 15.16             | 0.10     | -0.51    |
| PID5 Antagonism        | 37.67 | 12.33             | 0.50     | -0.81    |
| PID5 Disinhibition     | 44.40 | 13.91             | 0.34     | -0.70    |
| PID5 Psychoticism      | 62.05 | 22.40             | 0.42     | -0.75    |
| BSI Psychoticism       | 13.70 | 5.75              | 0.43     | -0.72    |
| BSI Somatization       | 14.34 | 6.55              | 0.79     | -0.04    |
| BSI Depression         | 16.54 | 7.14              | 0.18     | -1.03    |
| BSI Hostility          | 9.98  | 4.66              | 0.97     | 0.23     |
| BSI Phobia             | 13.13 | 6.14              | 0.71     | -0.26    |
| BSI Obsessive          | 15.13 | 6.88              | 0.34     | -0.93    |
| BSI Anxiety            | 13.64 | 6.41              | 0.59     | -0.64    |
| BSI Paranoia           | 13.18 | 6.23              | 0.60     | -0.56    |
| AUDIT total            | 16.38 | 6.97              | 1.27     | 0.84     |
| SDS total              | 6.37  | 2.73              | 1.98     | 2.91     |
| DAST total             | 17.26 | 7.84              | 1.38     | 1.31     |
| FTND total             | 1.16  | 2.36              | 1.88     | 2.22     |
| MAPP AS total          | 17.17 | 6.63              | 1.22     | 0.89     |
| STAI total             | 15.51 | 5.56              | 0.30     | -0.62    |
| FEAR total             | 36.14 | 11.59             | 0.42     | 0.02     |

## GENERAL FACTORS

26

|             |       |       |      |       |
|-------------|-------|-------|------|-------|
| ISS total   | 25.48 | 10.37 | 0.41 | -0.88 |
| PDI21 total | 37.50 | 15.31 | 1.01 | 0.15  |

*Note.* IPIP = International Personality Item Pool, BFI = Big Five Inventory, FFF = Five-Factor Form, PID5 = Personality Inventory for DSM-5, BSI = Brief Symptom Inventory, AUDIT = Alcohol Use Disorders Identification Test, SDS = Severity of Dependence Scale, DAST = Drug Abuse Screening Test, FTND = Fagerstrom Test for Nicotine Dependence, MAPP AS = Multi-Source Assessment of Personality Pathology antisocial scale, STAI = State-Trait Anxiety Inventory (Trait Version), FEAR = Fear Questionnaire, ISS = Internal State Scale, PDI21 = Peters et al. Delusions Inventory (21 item version).

GENERAL FACTORS

Table 2. Study 1 Correlations Among the General Personality Scales.

|        | IPIP_N  | IPIP_E  | IPIP_O | IPIP_A | IPIP_C  | BFI_E   | BFI_A   | BFI_C   | BFI_N  |
|--------|---------|---------|--------|--------|---------|---------|---------|---------|--------|
| IPIP_N |         |         |        |        |         |         |         |         |        |
| IPIP_E | -.583** |         |        |        |         |         |         |         |        |
| IPIP_O | 0.007   | 0.074   |        |        |         |         |         |         |        |
| IPIP_A | -.091*  | -.105*  | .194** |        |         |         |         |         |        |
| IPIP_C | -.576** | .309**  | 0.065  | .345** |         |         |         |         |        |
| BFI_E  | -.510** | .746**  | 0.032  | -.111* | .164**  |         |         |         |        |
| BFI_A  | -.354** | .209**  | 0.078  | .693** | .402**  | .144**  |         |         |        |
| BFI_C  | -.521** | .265**  | -0.024 | .274** | .856**  | .167**  | .377**  |         |        |
| BFI_N  | .818**  | -.515** | .146** | 0.027  | -.399** | -.501** | -.284** | -.401** |        |
| BFI_O  | -.153** | .249**  | .664** | .133** | .171**  | .210**  | .159**  | .128**  | -0.051 |

Note. \*\*  $p < .01$ , \*  $p < .05$ . N = neuroticism, E = extraversion, O = openness, A = agreeableness, C = conscientiousness. IPIP =

international personality item pool - 120, BFI = big five inventory.

## GENERAL FACTORS

28

Table 3. Study 1 Correlations Among the Personality Disorder Scales.

|                      | FFF_N   | FFF_E   | FFF_O  | FFF_A   | FFF_C   | PID5_Negative_Affect | PID5_Detachment | PID5_Antagonism | PID5_Disinhibition |
|----------------------|---------|---------|--------|---------|---------|----------------------|-----------------|-----------------|--------------------|
| FFF_N                |         |         |        |         |         |                      |                 |                 |                    |
| FFF_E                | -.179** |         |        |         |         |                      |                 |                 |                    |
| FFF_O                | 0.053   | .382**  |        |         |         |                      |                 |                 |                    |
| FFF_A                | -0.006  | .278**  | .241** |         |         |                      |                 |                 |                    |
| FFF_C                | -.284** | .373**  | .125** | .327**  |         |                      |                 |                 |                    |
| PID5_Negative_Affect | .648**  | -.234** | 0.027  | -0.010  | -.304** |                      |                 |                 |                    |
| PID5_Detachment      | .544**  | -.433** | -0.079 | -.206** | -.280** | .568**               |                 |                 |                    |
| PID5_Antagonism      | .119**  | .113*   | .116*  | -.304** | -.161** | .329**               | .333**          |                 |                    |
| PID5_Disinhibition   | .485**  | -.095*  | 0.060  | -.160** | -.501** | .656**               | .564**          | .595**          |                    |
| PID5_Psychoticism    | .446**  | -.124** | .173** | -.194** | -.250** | .647**               | .612**          | .631**          | .740**             |

Note. \*\*  $p < .01$ , \*  $p < .05$ . FFF = Five-Factor Form. PID5 = Personality Inventory for DSM-5. N = neuroticism, E = extraversion, O = openness, A = agreeableness, C = conscientiousness.



## GENERAL FACTORS

Table 4. Study 1 Correlations Among the Psychopathology Scales.

|                    | 1      | 2      | 3      | 4      | 5      | 6      | 7      | 8      | 9      | 10     | 11     | 12     | 13     | 14     | 15     | 16     |
|--------------------|--------|--------|--------|--------|--------|--------|--------|--------|--------|--------|--------|--------|--------|--------|--------|--------|
| 1 BSI_Psychoticism |        |        |        |        |        |        |        |        |        |        |        |        |        |        |        |        |
| 2 BSI_Somatization | .659** |        |        |        |        |        |        |        |        |        |        |        |        |        |        |        |
| 3 BSI_Depression   | .773** | .541** |        |        |        |        |        |        |        |        |        |        |        |        |        |        |
| 4 BSI_Hostility    | .666** | .608** | .549** |        |        |        |        |        |        |        |        |        |        |        |        |        |
| 5 BSI_Phobia       | .686** | .657** | .622** | .612** |        |        |        |        |        |        |        |        |        |        |        |        |
| 6 BSI_Obsessive    | .681** | .631** | .680** | .566** | .697** |        |        |        |        |        |        |        |        |        |        |        |
| 7 BSI_Anxiety      | .682** | .702** | .671** | .621** | .793** | .742** |        |        |        |        |        |        |        |        |        |        |
| 8 BSI_Paranoia     | .672** | .570** | .622** | .694** | .692** | .636** | .680** |        |        |        |        |        |        |        |        |        |
| 9 AUDIT_tot        | .299** | .322** | .173   | .312   | .250** | .258** | .252** | .283** |        |        |        |        |        |        |        |        |
| 10 SDS_tot         | .311** | .357** | .150   | .395** | .332** | .237** | .294** | .327** | .411** |        |        |        |        |        |        |        |
| 11 DAST_tot        | .350** | .357** | .230** | .345** | .301** | .297** | .309** | .345** | .411** | .630** |        |        |        |        |        |        |
| 12 FTND_tot        | .158   | .185   | .150   | .119   | .206** | .158   | .159   | .127** | .141** | .106*  | .222** |        |        |        |        |        |
| 13 MAPP_tot        | .476** | .462** | .316   | .573   | .411** | .375** | .424** | .485** | .487** | .551** | .547** | .145** |        |        |        |        |
| 14 STAI_tot        | .620** | .498** | .692** | .497** | .602** | .638** | .693** | .579** | .150** | .148** | .278** | .155** | .336** |        |        |        |
| 15 FEAR_tot        | .451** | .379** | .420** | .356** | .564** | .394** | .436** | .388** | .114   | .247** | .258** | .186** | .266** | .462** |        |        |
| 16 ISS_tot         | .640** | .545** | .577** | .648** | .594** | .631** | .657** | .611** | .368** | .341** | .410** | .218** | .592** | .650** | .411** |        |
| 17 PDI21_tot       | .598** | .569** | .400** | .606** | .558** | .480** | .517** | .604** | .388** | .527** | .507** | .210** | .633** | .437** | .429** | .638** |

Note. \*\*  $p < .01$ , \*  $p < .05$ . BSI = Brief Symptom Inventory. AUDIT = alcohol use disorders identification test, SDS = Substance dependence scale, DAST = drug abuse screening test, FTND = fagerstrom test for nicotine dependence, MAPP = multi-source assessment of personality pathology, STAI = state trait anxiety inventory, FEAR = fear questionnaire, ISS = internal states scale, PDI21 = peters delusions inventory-21.



GENERAL FACTORS

|                           |              |             |             |
|---------------------------|--------------|-------------|-------------|
| IPIP_Friendliness         | <b>.563</b>  | <b>.514</b> |             |
| IPIP_Gregariousness       | <b>.385</b>  | <b>.634</b> |             |
| IPIP_Assertiveness        | <b>.494</b>  | <b>.402</b> |             |
| IPIP_Activity_Level       | <b>.562</b>  | <b>.093</b> |             |
| IPIP_Excitement_Seeking   | <b>.039</b>  | <b>.575</b> |             |
| IPIP_Cheerfulness         | <b>.669</b>  | <b>.303</b> |             |
| BFI_E                     | <b>.525</b>  | <b>.686</b> |             |
| IPIP_Imagination          | <b>-.180</b> | <b>.517</b> |             |
| IPIP_Artistic_Interests   | <b>.105</b>  | <b>.751</b> |             |
| IPIP_Emotionality         | <b>-.337</b> | <b>.331</b> |             |
| IPIP_Adventurousness      | <b>.218</b>  | <b>.317</b> |             |
| IPIP_Intellect            | <b>.277</b>  | <b>.682</b> |             |
| IPIP_Liberalism           | <b>-.089</b> | <b>.422</b> |             |
| BFI_O                     | <b>.181</b>  | <b>.800</b> |             |
| IPIP_Trust                | <b>.458</b>  |             | <b>.238</b> |
| IPIP_Morality             | <b>.123</b>  |             | <b>.535</b> |
| IPIP_Altruism             | <b>.289</b>  |             | <b>.733</b> |
| IPIP_Cooperation          | <b>.327</b>  |             | <b>.616</b> |
| IPIP_Modesty              | <b>-.452</b> |             | <b>.466</b> |
| IPIP_Sympathy             | <b>-.016</b> |             | <b>.717</b> |
| BFI_A                     | <b>.463</b>  |             | <b>.680</b> |
| IPIP_Self_Efficacy        | <b>.650</b>  |             | <b>.392</b> |
| IPIP_Orderliness          | <b>.320</b>  |             | <b>.571</b> |
| IPIP_Dutifulness          | <b>.442</b>  |             | <b>.414</b> |
| IPIP_Achievement_Striving | <b>.529</b>  |             | <b>.409</b> |
| IPIP_Self_Discipline      | <b>.660</b>  |             | <b>.390</b> |
| IPIP_Cautiousness         | <b>.436</b>  |             | <b>.395</b> |
| BFI_C                     | <b>.611</b>  |             | <b>.745</b> |
| FFF_N                     | <b>.691</b>  |             | <b>.263</b> |

## GENERAL FACTORS

|                        |              |             |             |             |
|------------------------|--------------|-------------|-------------|-------------|
| PID5_Emotional_Labil   | <b>.752</b>  | .199        |             |             |
| PID5_Anxiousness       | <b>.749</b>  | <b>.536</b> |             |             |
| PID5_Separation_Insec  | <b>.620</b>  | .051        |             |             |
|                        |              |             | -           |             |
| FFF_E                  | <b>-.318</b> |             | .346        |             |
| PID5_Withdrawal        | <b>.622</b>  |             | <b>.750</b> |             |
| PID5_Anhedonia         | <b>.807</b>  |             | .160        |             |
| PID5_Intimacy_Avoid    | <b>.429</b>  |             | <b>.316</b> |             |
| FFF_O                  | -.036        |             |             | <b>.263</b> |
| PID5_Unusual_Beliefs   | <b>.568</b>  |             |             | <b>.724</b> |
| PID5_Perceptual_Dysreg | <b>.733</b>  |             |             | <b>.542</b> |
| PID5_Eccentricity      | <b>.711</b>  |             |             | <b>.387</b> |
|                        |              |             |             | -           |
| FFF_A                  | -.164        |             |             | <b>.281</b> |
| PID5_Manipulativeness  | <b>.303</b>  |             |             | <b>.814</b> |
| PID5_Deceitfulness     | <b>.502</b>  |             |             | <b>.775</b> |
| PID5_Grandiosity       | .256         |             |             | <b>.633</b> |
|                        |              |             |             | -           |
| FFF_C                  | <b>-.433</b> |             |             | <b>.330</b> |
| PID5_Irresponsibility  | <b>.699</b>  |             |             | <b>.569</b> |
| PID5_Distractibility   | <b>.776</b>  |             |             | <b>.265</b> |
| PID5_Impulsivity       | <b>.592</b>  |             |             | <b>.485</b> |

*Note.* Analysis conducted with the lavaan package in R software. MLR estimation was used.

## GENERAL FACTORS

Table 6. Study 1 Combined Model Loadings.

| Scale                | p     | GFP/g- |       |       |       |       |       |       |
|----------------------|-------|--------|-------|-------|-------|-------|-------|-------|
|                      |       | PD     | Ext   | N     | E     | O     | A     | C     |
| BSI_Hostility        | 0.78  |        | 0.101 |       |       |       |       |       |
| AUDIT_tot            | 0.416 |        | 0.432 |       |       |       |       |       |
| SDS_tot              | 0.457 |        | 0.536 |       |       |       |       |       |
| smoke_tot            | 0.217 |        | 0.015 |       |       |       |       |       |
| DAST_tot             | 0.484 |        | 0.451 |       |       |       |       |       |
| MAPP_tot             | 0.656 |        | 0.559 |       |       |       |       |       |
| BSI_Depression       | 0.727 |        |       | 0.435 |       |       |       |       |
|                      |       |        |       | -     |       |       |       |       |
| BSI_Somatization     | 0.751 |        |       | 0.041 |       |       |       |       |
| BSI_Phobia           | 0.799 |        |       | 0.122 |       |       |       |       |
| STAI_tot             | 0.69  |        |       | 0.467 |       |       |       |       |
| FEAR_tot             | 0.515 |        |       | 0.213 |       |       |       |       |
| BSI_Obsessive        | 0.776 |        |       |       |       |       |       |       |
| BSI_Psychoticism     | 0.846 |        |       |       |       |       |       |       |
| BSI_Paranoia         | 0.803 |        |       |       |       |       |       |       |
| ISS_tot              | 0.802 |        |       |       |       |       |       |       |
| PDI21_tot            | 0.752 |        |       |       |       |       |       |       |
| IPIP_N               |       | 0.593  |       | 0.713 |       |       |       |       |
| BFI_N                |       | 0.434  |       | 0.797 |       |       |       |       |
| FFF_N                |       | 0.524  |       | 0.58  |       |       |       |       |
| PID5_Negative_Affect |       | 0.733  |       | 0.506 |       |       |       |       |
| IPIP_E               |       | -0.195 |       |       | 0.879 |       |       |       |
| BFI_E                |       | -0.174 |       |       | 0.821 |       |       |       |
| FFF_E                |       | -0.099 |       |       | 0.727 |       |       |       |
|                      |       |        |       |       | -     |       |       |       |
| PID5_Detachment      |       | 0.679  |       |       | 0.497 |       |       |       |
| IPIP_O               |       | -0.115 |       |       |       | 0.761 |       |       |
| BFI_O                |       | -0.073 |       |       |       | 0.856 |       |       |
| FFF_O                |       | 0.082  |       |       |       | 0.702 |       |       |
| PID5_Psychoticism    |       | 0.881  |       |       |       | 0.129 |       |       |
| IPIP_A               |       | -0.443 |       |       |       |       | 0.854 |       |
| BFI_A                |       | -0.489 |       |       |       |       | 0.55  |       |
| FFF_A                |       | -0.16  |       |       |       |       | 0.562 |       |
|                      |       |        |       |       |       |       | -     |       |
| PID5_Antagonism      |       | 0.656  |       |       |       |       | 0.419 |       |
| IPIP_C               |       | -0.583 |       |       |       |       |       | 0.738 |
| BFI_C                |       | -0.499 |       |       |       |       |       | 0.772 |
| FFF_C                |       | -0.273 |       |       |       |       |       | 0.676 |

## GENERAL FACTORS

34

|                    |      |   |       |
|--------------------|------|---|-------|
| PID5_Disinhibition | 0.84 | - | 0.377 |
|--------------------|------|---|-------|

*Note.* Loadings in bold significant at  $p < .001$ . Estimation method = MLR. N = neuroticism, E = extraversion, O = openness, A = agreeableness, C = conscientiousness, Int = Internalizing, Ext = Externalizing, NEG = negative affect, DET = detachment, PSY = psychoticism, ANT = antagonism, DIS = disinhibition. IPIP = International Personality Item Pool, BFI = Big Five Inventory, FFF = Five-Factor Form, PID5 = Personality Inventory for DSM-5, BSI = Brief Symptom Inventory, AUDIT = Alcohol Use Disorders Identification Test, SDS = Severity of Dependence Scale, DAST = Drug Abuse Screening Test, FTND = Fagerstrom Test for Nicotine Dependence, MAPP AS = Multi-Source Assessment of Personality Pathology antisocial scale, STAI = State-Trait Anxiety Inventory (Trait Version), FEAR = Fear Questionnaire, ISS = Internal State Scale, PDI21 = Peters et al. Delusions Inventory (21 item version). N correlated with E  $-.646$ , N with O  $-.002$ , N with A  $.336$ , N with C  $-.321$ , E with O  $.251$ , E with A  $-.191$ , E with C  $.220$ , O with A  $.141$ , O with C  $.063$ , and A with C  $.096$ . Ext & N correlated =  $-.565$ , Ext with E  $.514$ , Ext with A  $-.485$ , Ext with C  $-.087$ . (all correlations  $p < .001$ , except Ext with C, N with O, O with C, and A with C, which were not significant).

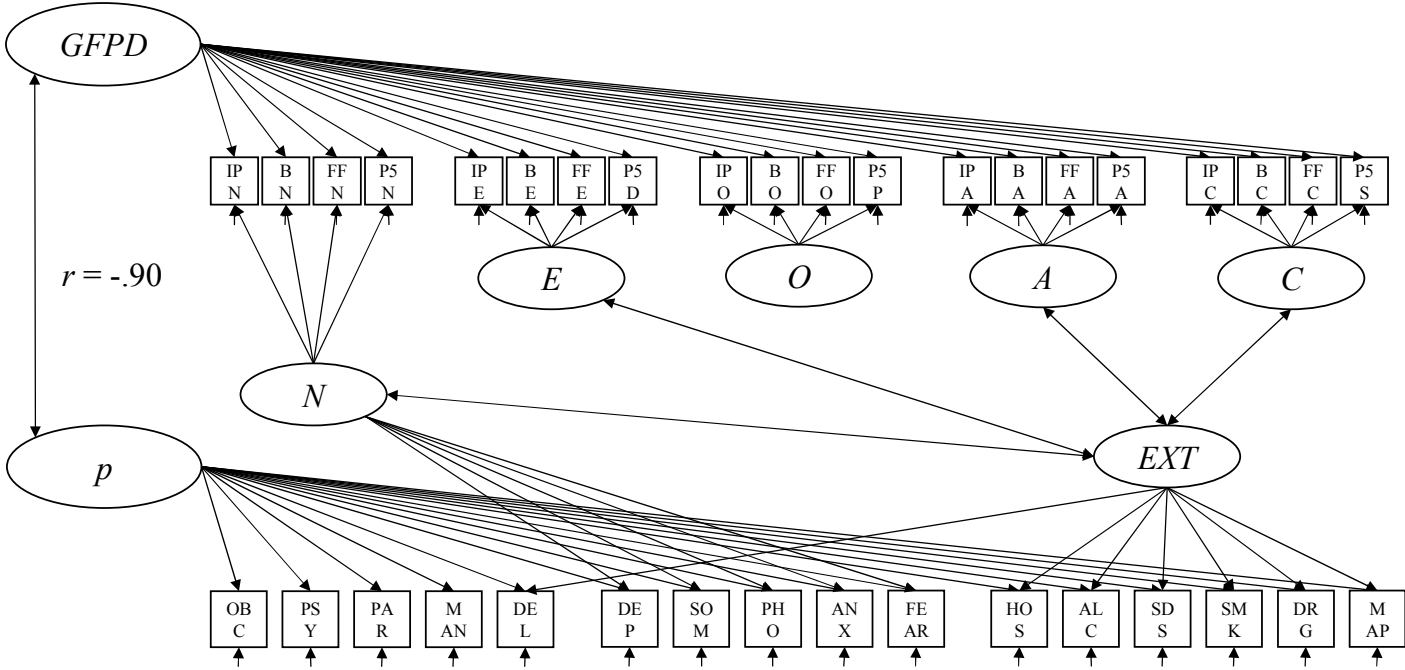

Supplemental Figure 1. Study 1 Combined Domain-Level Model.

Note. Correlation was allowed between the N, E, O, A, and C latent factors, but not specified in this figure to ease interpretability. GFPD = combined GFP and g-PD. IP = International Personality Item Pool, B = Big Five Inventory, FF = Five-Factor Form, P5 = Personality Inventory for DSM-5. N = neuroticism, E = extraversion, O = openness, A = agreeableness, and C = conscientiousness. *p* = *p* factor, OBC = obsessive-compulsive, PSY = psychoticism, PAR = BSI Paranoia, MAN = BSI Mania, DEL = Peters et al. Delusions Inventory, DEP = BSI Depression, SOM = BSI Somatization, PHO = BSI Phobia, ANX = BSI Anxiety, FEAR = Fear Questionnaire, HOS = BSI Hostility, ALC = Alcohol Use Disorders Identification Test, SDS = Severity of Dependence Scale, SMK = Fagerstrom Test for Nicotine Dependence, DRG = Drug Abuse Screening Test, MAP = Multi-Source Assessment of Personality Pathology Antisocial scale. Double sided arrows = correlation, single sided arrows = regression.

## GENERAL FACTORS

36

Study 1 Alternative Model Fit IndicesFull model:Study 1 2<sup>nd</sup> order hierarchical version of the full model (the model was not positive definite):

RMSEA = .090 (90% CI = .088, .092), SRMR = .148, CFI = .623, TLI = .609,  $df = 2394$ ,  $\chi^2 = 11576.399$ ,  $p < .001$ , AIC = 183615.348, BIC = 184584.909.

Study 1 single-factor version of the full model:

RMSEA = .108 (90% CI = .107, .110), SRMR = .150, CFI = .449, TLI = .433,  $df = 2411$ ,  $\chi^2 = 15816.713$ ,  $p < .001$ , AIC = 188247.287, BIC = 189146.108.

*Note.* In the second-order versions,  $p$  was extracted from the internalizing and externalizing latent factors, the GFP was extracted from the five normal-personality latent dimensions, and the g-PD was extracted from the five maladaptive-personality latent dimensions. Correlations were specified between neuroticism and negative affect, extraversion and detachment, openness and psychoticism, and conscientiousness and disinhibition. In the single-factor versions,  $p$  was extracted from all 16 observed psychopathology indicators, GFP was extracted from all 35 observed normal indicators, and g-PD was extracted from all 20 observed maladaptive personality indicators.

Combined Model:Study 1 2<sup>nd</sup>-order hierarchical estimation of the general factors:

RMSEA = .116 (90% CI = .113, .119), SRMR = .164, CFI = .686, TLI = .660,  $df = 582$ ,  $\chi^2 = 4283.421$ ,  $p < .001$ , AIC = 108592.067, BIC = 109091.412

Study 1 single-factor estimation of the general factors:

RMSEA = .141 (90% CI = .138, .144), SRMR = .133, CFI = .526, TLI = .496,  $df = 593$ ,  $\chi^2 = 6171.796$ ,  $p < .001$ , AIC = 110763.401, BIC = 111216.973

*Note.* In the second-order hierarchical versions,  $p$  was extracted from the externalizing, combined internalizing/neuroticism/negative affect latent factors, and observed thought disorder indicators, and the GFP/g-PD was extracted from the five personality dimensions (neuroticism/negative affect, extraversion/detachment, openness/psychoticism, agreeableness/antagonism, and conscientiousness/disinhibition). In the single-factor versions,  $p$  was extracted from the 16 observed psychopathology indicators and the GFP/g-PD was extracted from 20 observed domain-level indicators of normal/maladaptive personality.



**Study 2 Measures:****Measures of Personality**

*NEO Personality Inventory-Revised (NEO PI-R; Costa & McCrae, 1992)*. The NEO PI-R is a 240-item self-report questionnaire that assesses the five domains of the five-factor model as well as 30 lower-order facets. Self- and informant-report versions were used in the current study.

Internal consistency for self-reports ranged from  $\alpha = .58$  (Tender-Mindedness) to  $.84$  (Depression), with a median of  $.71$ . Internal consistency for informant-reports ranged from  $\alpha = .60$  (Actions) to  $.89$  (Self-Discipline), with a median of  $.80$ .

**Measures of Personality Disorder**

*Structured Interview for DSM-IV Personality (SIDP-IV; Pfohl, Blum, & Zimmerman 1997)*. The SIDP-IV is a structured interview assessing the 10 DSM-IV criteria for personality disorders. Each criterion was rated from 0 (*not present*) to 3 (*strongly present*). The interviews were administered by trained staff and case conferences were regularly conducted to discuss ratings. Inter-rater reliability for a subsection of 265 baseline SIDP-IV interviews was ICC =  $.67$  (Oltmanns et al., 2014). Internal consistency for the interview criteria used in the present study ranged from  $\alpha = .52$  (dependent) to  $.83$  (avoidant), with a median of  $.64$ .

*Multi-Source Assessment of Personality Pathology (MAPP; Oltmanns & Turkheimer, 2006)*. The MAPP is an 80-item assessment instrument for the criteria of the DSM-IV personality disorders that has self-report and informant-report versions. The DSM personality disorder criteria were translated into layman's language. Internal consistency for self-reports ranged from  $\alpha = .50$  (Antisocial) to  $.80$  (Avoidant), with a median of  $.68$ . Internal consistency for informant-reports ranged from  $\alpha = .66$  (Schizoid) to  $.85$  (Avoidant), with a median of  $.79$ .

**Maladaptivity/Life Outcome Measures.**

Scores were scaled using mean imputation if 1-2 items were missing.

The Rand-36 Health Status Inventory (HSI; Hays & Morales, 2001) is a measure of health functioning that includes eight subscales: physical functioning ( $\alpha = .92$ ;  $\alpha = .91$ ), role limitations due to physical health problems ( $\alpha = .89$ ;  $\alpha = .89$ ), role limitation due to emotional problems ( $\alpha = .84$ ;  $\alpha = .82$ ), pain ( $\alpha = .76$ ;  $\alpha = .78$ ), health perceptions ( $\alpha = .82$ ;  $\alpha = .82$ ), emotional well-being ( $\alpha = .79$ ;  $\alpha = .80$ ), social functioning ( $\alpha = .81$ ;  $\alpha = .84$ ), and energy/fatigue ( $\alpha = .88$ ;  $\alpha = .86$ ) that can be combined to create three composite general, physical, and emotional health scores. Informants completed an abbreviated 10-item version of the HSI about the target participant's health status, providing one composite score of general physical and emotional health functioning ( $\alpha = .66$ ;  $\alpha = .66$ ).

The Insomnia Severity Index (ISI; Bastien, Vallieres, & Morin, 2001) consists of seven items measuring insomnia symptoms such as difficulty with sleep onset latency, wake after sleep onset, early waking, and associated distress over the past two weeks. Items are rated from 0 (*no distress*) to 4 (*significant distress*). 1,216 participants completed the ISI ( $\alpha = .90$ ). At the second wave, 1,002 participants completed the ISI ( $\alpha = .88$ ). A cut score of 10 is useful as an indicator of clinical insomnia in community adults (Morin, Belleville, Belanger, & Ivers, 2011). 21% of participants scored above 10 ( $n = 254$ ). Only participants completed the ISI.

At each wave, participants were instructed to list first names of the people within the “innermost,” “middle,” and “outer circles” of their lives (Lang & Carstensen, 1994). Afterwards, they were instructed to answer The Quality of Relationships Questionnaire - Social Support (SNQ; Pierce, Sarason, & Sarason, 1991), which is a 7-item scale rated from 1 (*not at all*) to 4

(*very much*) about how much they could rely on these people for advice, help, feedback, and support ( $\alpha = .89$ ,  $\alpha = .91$ ). Only participants completed the SNQ.

The Satisfaction With Life Scale (SWLS; Diener, Emmons, Larsen, & Briffin, 1985) is a well-validated 5-item self-report scale assessing life satisfaction ( $\alpha = .90$ ,  $\alpha = .89$ ). Only participants completed the SWLS.

The UCLA Loneliness Scale (Russell, 1996) is a 20-item self-report scale assessing loneliness. Items were rated on a scale from 1 (*never*) to 4 (*always*) ( $\alpha = .93$ ,  $\alpha = .94$ ). Only participants completed the UCLA.

## GENERAL FACTORS

40

Table 7. *Descriptive Statistics for Study 2 Variables.*

|        | <i>M</i> | <i>SD</i> | Skewness  |           | Kurtosis  |           |
|--------|----------|-----------|-----------|-----------|-----------|-----------|
|        |          |           | Statistic | <i>SE</i> | Statistic | <i>SE</i> |
| PNEON1 | 1.56     | 0.59      | 0.44      | 0.07      | 0.35      | 0.14      |
| PNEON2 | 1.31     | 0.52      | 0.38      | 0.07      | 0.49      | 0.14      |
| PNEON3 | 1.30     | 0.66      | 0.78      | 0.07      | 0.73      | 0.14      |
| PNEON4 | 1.57     | 0.53      | 0.49      | 0.07      | 0.33      | 0.14      |
| PNEON5 | 1.80     | 0.51      | 0.23      | 0.07      | -0.22     | 0.14      |
| PNEON6 | 1.09     | 0.48      | 0.77      | 0.07      | 1.88      | 0.14      |
| PNEOE1 | 2.87     | 0.50      | -0.42     | 0.07      | 0.46      | 0.14      |
| PNEOE2 | 2.11     | 0.62      | -0.34     | 0.07      | -0.04     | 0.14      |
| PNEOE3 | 2.08     | 0.57      | -0.08     | 0.07      | -0.12     | 0.14      |
| PNEOE4 | 2.01     | 0.52      | 0.12      | 0.07      | 0.23      | 0.14      |
| PNEOE5 | 1.84     | 0.57      | -0.03     | 0.07      | -0.16     | 0.14      |
| PNEOE6 | 2.50     | 0.59      | -0.23     | 0.07      | 0.00      | 0.14      |
| PNEOO1 | 2.03     | 0.57      | 0.35      | 0.07      | 0.00      | 0.14      |
| PNEOO2 | 2.37     | 0.64      | -0.19     | 0.07      | -0.09     | 0.14      |
| PNEOO3 | 2.48     | 0.47      | 0.04      | 0.07      | -0.02     | 0.14      |
| PNEOO4 | 1.98     | 0.49      | 0.00      | 0.07      | -0.23     | 0.14      |
| PNEOO5 | 2.47     | 0.64      | -0.22     | 0.07      | -0.14     | 0.14      |
| PNEOO6 | 2.66     | 0.52      | -0.17     | 0.07      | 0.12      | 0.14      |
| PNEOA1 | 2.75     | 0.50      | -0.49     | 0.07      | 0.90      | 0.14      |
| PNEOA2 | 2.87     | 0.48      | -0.18     | 0.07      | -0.03     | 0.14      |
| PNEOA3 | 3.07     | 0.42      | -0.07     | 0.07      | 0.16      | 0.14      |
| PNEOA4 | 2.44     | 0.46      | -0.07     | 0.07      | 0.08      | 0.14      |
| PNEOA5 | 2.52     | 0.50      | -0.20     | 0.07      | 0.27      | 0.14      |
| PNEOA6 | 2.74     | 0.43      | -0.19     | 0.07      | 0.48      | 0.14      |
| PNEOC1 | 2.95     | 0.41      | -0.35     | 0.07      | 0.91      | 0.14      |
| PNEOC2 | 2.25     | 0.52      | -0.19     | 0.07      | 0.28      | 0.14      |
| PNEOC3 | 2.98     | 0.45      | -0.23     | 0.07      | 0.02      | 0.14      |
| PNEOC4 | 2.35     | 0.51      | -0.17     | 0.07      | 0.27      | 0.14      |
| PNEOC5 | 2.66     | 0.57      | -0.65     | 0.07      | 0.47      | 0.14      |
| PNEOC6 | 2.43     | 0.47      | -0.26     | 0.07      | 0.06      | 0.14      |
| INEON1 | 1.80     | 0.69      | 0.33      | 0.08      | -0.15     | 0.15      |
| INEON2 | 1.71     | 0.77      | 0.46      | 0.08      | -0.39     | 0.15      |
| INEON3 | 1.53     | 0.75      | 0.55      | 0.08      | 0.05      | 0.15      |
| INEON4 | 1.60     | 0.57      | 0.49      | 0.08      | 0.43      | 0.15      |
| INEON5 | 1.85     | 0.65      | 0.17      | 0.08      | -0.17     | 0.15      |
| INEON6 | 1.24     | 0.63      | 0.80      | 0.08      | 1.04      | 0.15      |
| INEOE1 | 2.90     | 0.61      | -0.77     | 0.08      | 0.97      | 0.15      |
| INEOE2 | 2.15     | 0.69      | -0.25     | 0.08      | -0.28     | 0.15      |

## GENERAL FACTORS

41

|         |      |      |       |      |       |      |
|---------|------|------|-------|------|-------|------|
| INEOE3  | 2.23 | 0.63 | -0.22 | 0.08 | 0.01  | 0.15 |
| INEOE4  | 2.07 | 0.58 | -0.02 | 0.08 | 0.00  | 0.15 |
| INEOE5  | 1.85 | 0.58 | -0.07 | 0.08 | -0.09 | 0.15 |
| INEOE6  | 2.32 | 0.69 | -0.44 | 0.08 | -0.04 | 0.15 |
| INEOO1  | 1.97 | 0.58 | 0.20  | 0.08 | 0.23  | 0.15 |
| INEOO2  | 2.17 | 0.69 | -0.25 | 0.08 | 0.06  | 0.15 |
| INEOO3  | 2.46 | 0.48 | -0.13 | 0.08 | 0.46  | 0.15 |
| INEOO4  | 1.78 | 0.51 | -0.05 | 0.08 | -0.15 | 0.15 |
| INEOO5  | 2.46 | 0.71 | -0.27 | 0.08 | -0.21 | 0.15 |
| INEOO6  | 2.48 | 0.53 | -0.10 | 0.08 | 0.23  | 0.15 |
| INEOA1  | 2.53 | 0.68 | -0.69 | 0.08 | 0.48  | 0.15 |
| INEOA2  | 2.73 | 0.62 | -0.55 | 0.08 | 0.33  | 0.15 |
| INEOA3  | 3.04 | 0.60 | -0.83 | 0.08 | 1.40  | 0.15 |
| INEOA4  | 2.17 | 0.69 | -0.35 | 0.08 | -0.06 | 0.15 |
| INEOA5  | 2.41 | 0.67 | -0.57 | 0.08 | 0.59  | 0.15 |
| INEOA6  | 2.55 | 0.52 | -0.47 | 0.08 | 0.82  | 0.15 |
| INEOC1  | 2.99 | 0.55 | -0.59 | 0.08 | 0.61  | 0.15 |
| INEOC2  | 2.22 | 0.69 | -0.41 | 0.08 | 0.11  | 0.15 |
| INEOC3  | 2.97 | 0.58 | -0.76 | 0.08 | 1.11  | 0.15 |
| INEOC4  | 2.47 | 0.59 | -0.35 | 0.08 | 0.49  | 0.15 |
| INEOC5  | 2.65 | 0.74 | -0.70 | 0.08 | 0.43  | 0.15 |
| INEOC6  | 2.45 | 0.65 | -0.58 | 0.08 | 0.14  | 0.15 |
| PMAPPPA | 0.74 | 0.51 | 1.18  | 0.07 | 2.26  | 0.14 |
| PMAPPSZ | 1.06 | 0.54 | 0.78  | 0.07 | 0.94  | 0.14 |
| PMAPPST | 0.53 | 0.41 | 1.39  | 0.07 | 3.02  | 0.14 |
| PMAPPAS | 0.49 | 0.35 | 1.29  | 0.07 | 4.13  | 0.14 |
| PMAPPBD | 0.39 | 0.37 | 1.61  | 0.07 | 4.07  | 0.14 |
| PMAPPHS | 0.72 | 0.46 | 0.84  | 0.07 | 1.34  | 0.14 |
| PMAPPNA | 0.61 | 0.39 | 0.98  | 0.07 | 1.55  | 0.14 |
| PMAPPAV | 0.58 | 0.52 | 1.52  | 0.07 | 3.67  | 0.14 |
| PMAPPDP | 0.34 | 0.37 | 1.86  | 0.07 | 4.89  | 0.14 |
| PMAPPOC | 1.12 | 0.55 | 0.52  | 0.07 | 0.36  | 0.14 |
| IMAPPPA | 0.96 | 0.73 | 0.96  | 0.08 | 0.63  | 0.15 |
| IMAPPSZ | 1.06 | 0.62 | 0.85  | 0.08 | 0.71  | 0.15 |
| IMAPPST | 0.61 | 0.54 | 1.46  | 0.08 | 2.74  | 0.15 |
| IMAPPAS | 0.59 | 0.52 | 1.36  | 0.08 | 2.46  | 0.15 |
| IMAPPBD | 0.54 | 0.55 | 1.66  | 0.08 | 3.52  | 0.15 |
| IMAPPHS | 0.81 | 0.62 | 1.16  | 0.08 | 1.76  | 0.15 |
| IMAPPNA | 0.74 | 0.59 | 1.41  | 0.08 | 2.93  | 0.15 |
| IMAPPAV | 0.62 | 0.65 | 1.46  | 0.08 | 2.07  | 0.15 |
| IMAPPDP | 0.47 | 0.55 | 1.79  | 0.08 | 4.00  | 0.15 |

## GENERAL FACTORS

42

|         |      |      |      |      |       |      |
|---------|------|------|------|------|-------|------|
| IMAPPOC | 1.33 | 0.65 | 0.53 | 0.08 | 0.22  | 0.15 |
| SIDPPA  | 0.13 | 0.24 | 3.07 | 0.07 | 12.74 | 0.14 |
| SIDPSZ  | 0.15 | 0.26 | 2.67 | 0.07 | 9.10  | 0.14 |
| SIDPST  | 0.08 | 0.17 | 3.95 | 0.07 | 26.76 | 0.14 |
| SIDPAS  | 0.02 | 0.08 | 5.28 | 0.07 | 36.55 | 0.14 |
| SIDPBD  | 0.10 | 0.19 | 3.27 | 0.07 | 14.96 | 0.14 |
| SIDPHS  | 0.10 | 0.19 | 3.24 | 0.07 | 14.04 | 0.14 |
| SIDPNA  | 0.14 | 0.25 | 2.86 | 0.07 | 10.31 | 0.14 |
| SIDPAV  | 0.11 | 0.28 | 4.29 | 0.07 | 22.64 | 0.14 |
| SIDPDP  | 0.05 | 0.13 | 3.95 | 0.07 | 20.66 | 0.14 |
| SIDPOC  | 0.32 | 0.29 | 1.19 | 0.07 | 1.41  | 0.14 |

*Note.* P = participant (self-report), I = informant. N = neuroticism, E = extraversion, O = openness, A = agreeableness, C = conscientiousness, SZ = schizoid, ST = schizotypal, PA = paranoid, BD = borderline, NA = narcissistic, HS = histrionic, AV = avoidant, DP = dependent, OC = obsessive-compulsive. MAPP = Multi-Source Assessment of Personality Pathology, SIDP = Structured Interview for DSM-IV Personality.

GENERAL FACTORS

Table 8. Correlations Among Study 2 Self-report and Informant-report NEO Variables.

|   | N       | E       | O       | A       | C       |
|---|---------|---------|---------|---------|---------|
| N | 1       | -.379** | -.106** | -.507** | -.618** |
| E | -.417** | 1       | .418**  | .271**  | .325**  |
| O | -.125** | .417**  | 1       | .222**  | .109**  |
| A | -.307** | .213**  | .208**  | 1       | .429**  |
| C | -.598** | .399**  | .068*   | .212**  | 1       |

*Note.* Informant correlations are on the top of the diagonal. Participant correlations are below the diagonal.  
 \*\* =  $p < .01$ , \*  $p < .05$ .

## GENERAL FACTORS

44

Table 9. *Correlations Among Study 2 g-PD Scales.*

|                | PFU5MAP<br>PPA | PFU5MAP<br>PSZ | PFU5MAP<br>PST | PFU5MAP<br>PAS | PFU5MAP<br>PBD | PFU5MAP<br>PHS | PFU5MAP<br>PNA | PFU5MAP<br>PAV |
|----------------|----------------|----------------|----------------|----------------|----------------|----------------|----------------|----------------|
| PFU5MAPP<br>PA |                |                |                |                |                |                |                |                |
| PFU5MAPP<br>SZ | .414           |                |                |                |                |                |                |                |
| PFU5MAPP<br>ST | .666           | .446           |                |                |                |                |                |                |
| PFU5MAPP<br>AS | .415           | .311           | .478           |                |                |                |                |                |
| PFU5MAPP<br>BD | .580           | .379           | .605           | .565           |                |                |                |                |
| PFU5MAPP<br>HS | .522           | .206           | .517           | .512           | .595           |                |                |                |
| PFU5MAPP<br>NA | .538           | .285           | .506           | .477           | .494           | .643           |                |                |
| PFU5MAPP<br>AV | .509           | .419           | .511           | .343           | .559           | .389           | .412           |                |
| PFU5MAPP<br>DP | .454           | .284           | .482           | .435           | .614           | .495           | .454           | .635           |
| PFU5MAPP<br>OC | .595           | .432           | .537           | .387           | .462           | .484           | .525           | .418           |
| IFU5MAPP<br>PA | .225           | .121           | .194           | .075           | .170           | .114           | .137           | .120           |
| IFU5MAPP<br>SZ | .160           | .224           | .174           | .098           | .150           | .074           | .122           | .138           |



GENERAL FACTORS

|                |      |      |      |      |      |      |      |      |
|----------------|------|------|------|------|------|------|------|------|
| IFU5MAPP<br>ST | .162 | .116 | .255 | .120 | .179 | .145 | .111 | .126 |
| IFU5MAPP<br>AS | .137 | .092 | .218 | .269 | .238 | .208 | .172 | .083 |
| IFU5MAPP<br>BD | .175 | .114 | .217 | .171 | .284 | .223 | .130 | .147 |
| IFU5MAPP<br>HS | .099 | .029 | .174 | .176 | .198 | .275 | .145 | .047 |
| IFU5MAPP<br>NA | .135 | .095 | .185 | .155 | .193 | .217 | .218 | .067 |
| IFU5MAPP<br>AV | .158 | .123 | .176 | .100 | .181 | .147 | .122 | .301 |
| IFU5MAPP<br>DP | .123 | .056 | .144 | .140 | .218 | .210 | .123 | .186 |
| IFU5MAPP<br>OC | .132 | .128 | .134 | .054 | .100 | .073 | .163 | .082 |

## GENERAL FACTORS

46

Table 9 (cont.)

|                | PFU5MAP<br>PDP | PFU5MAP<br>POC | IFU5MAP<br>PPA | IFU5MAP<br>PSZ | IFU5MAP<br>PST | IFU5MAP<br>PAS | IFU5MAP<br>PBD | IFU5MAP<br>PHS | IFU5MAP<br>PNA |
|----------------|----------------|----------------|----------------|----------------|----------------|----------------|----------------|----------------|----------------|
| PFU5MAP<br>POC | .385           |                |                |                |                |                |                |                |                |
| IFU5MAP<br>PPA | .076           | .153           |                |                |                |                |                |                |                |
| IFU5MAP<br>PSZ | .069           | .145           | .504           |                |                |                |                |                |                |
| IFU5MAP<br>PST | .094           | .113           | .728           | .513           |                |                |                |                |                |
| IFU5MAP<br>PAS | .120           | .119           | .600           | .434           | .641           |                |                |                |                |
| IFU5MAP<br>PBD | .176           | .128           | .701           | .437           | .738           | .738           |                |                |                |
| IFU5MAP<br>PHS | .118           | .071           | .615           | .331           | .647           | .682           | .745           |                |                |
| IFU5MAP<br>PNA | .085           | .146           | .692           | .455           | .676           | .704           | .699           | .764           |                |
| IFU5MAP<br>PAV | .212           | .091           | .589           | .429           | .630           | .456           | .620           | .499           | .481           |
| IFU5MAP<br>PDP | .272           | .075           | .539           | .349           | .604           | .566           | .687           | .612           | .573           |
| IFU5MAP<br>POC | .041           | .240           | .591           | .493           | .498           | .343           | .427           | .423           | .502           |

GENERAL FACTORS

Table 9 (cont.)

|            | IFU5MAPPAV | IFU5MAPPDP |
|------------|------------|------------|
| IFU5MAPPDP | .664       |            |
| IFU5MAPPOC | .415       | .335       |

## GENERAL FACTORS

48

Table 10. *Correlations Among Study 2 Interview Variables.*

|               | FU5SIDP<br>PA | FU5SIDP<br>SZ | FU5SIDP<br>ST | FU5SIDP<br>AS | FU5SIDP<br>BD | FU5SIDP<br>HS | FU5SIDP<br>NA | FU5SIDP<br>AV | FU5SIDP<br>DP |
|---------------|---------------|---------------|---------------|---------------|---------------|---------------|---------------|---------------|---------------|
| FU5SIDP<br>PA |               |               |               |               |               |               |               |               |               |
| FU5SIDP<br>SZ | .298          |               |               |               |               |               |               |               |               |
| FU5SIDP<br>ST | .497          | .515          |               |               |               |               |               |               |               |
| FU5SIDP<br>AS | .137          | .041          | .114          |               |               |               |               |               |               |
| FU5SIDP<br>BD | .367          | .162          | .325          | .347          |               |               |               |               |               |
| FU5SIDP<br>HS | .159          | -.055         | .145          | .206          | .305          |               |               |               |               |
| FU5SIDP<br>NA | .295          | .040          | .167          | .202          | .236          | .331          |               |               |               |
| FU5SIDP<br>AV | .215          | .267          | .236          | .088          | .271          | -.008         | .008          |               |               |
| FU5SIDP<br>DP | .168          | .064          | .175          | .128          | .400          | .149          | .104          | .392          |               |
| FU5SIDP<br>OC | .334          | .189          | .206          | .126          | .317          | .116          | .214          | .220          | .192          |

Description of model construction for Study 2 (displayed in manuscript Figure 2).

The GFP bifactor model contained two method-specific factors (self-report and informant-report NEO-PI-R) and five FFM domain specific factors. NEO-PI-R facets were allowed to correlate because they were measures of the same facet and were likely to be associated.

For the g-PD model, there was little a priori information about the ideal number of specific factors to extract in a bifactor analysis of DSM-IV PD criteria (Sharp et al., 2015; Wright et al., 2016). Therefore, exploratory methods were undertaken to delineate a factor structure. First, each of the three methods (i.e., the self-MAPP, informant-MAPP, and SIDP interview) were separately subjected to parallel analyses and Velicer's MAP tests using the paran and paramap R packages (Dinno, 2012; O'Connor, 2017). Both parallel analysis and the MAP test recommended only extracting one factor from the self and informant MAPPs, and recommended extracting three factors from the SIDP. Exploratory principal factor analysis with oblimin rotation was conducted on the scales of the SIDP using the R psych package (Revelle, 2017). Loadings on the three factors were consistent with the traditional DSM-based PD clusters, with the exception of OCPD, which loaded  $\sim .20$  on each factor. Thus, one specific factor was specified in a bifactor model for each MAPP perspective, and three specific factors for the SIDP, which were modeled after the EFA loadings (i.e., according to DSM cluster). However, loadings on the cluster C SIDP specific factor in the initial bifactor model were not statistically significant. The cluster C specific factor was thus deleted. Correlations were specified between self- and informant-reports of the same MAPP PD scales.

Across the GFP and g-PD models, correlations between the SIDP-IV cluster A factor and neuroticism and extraversion, and the SIDP-IV cluster B factor and neuroticism, extraversion, agreeableness, and conscientiousness were added, following associations found in Samuel and Widiger (2008). It was less clear whether and how correlations should be specified between the broader methodological factors (i.e., self- and informant-report NEO PI-R specific factors in the GFP model, and the self- and informant-report MAPP specific factors in the g-PD model). Thus, four models were compared: (1) a model without correlation between method specifics within domains or across domains (e.g., no correlation between self-report and informant-reports of normal personality or personality disorder, and no correlation between self-reports of normal personality and self-reports of personality disorder), (2) a second model with correlation between method specifics within each domain (e.g., correlation allowed between self- and informant-reports of normal personality, and self- and informant-reports of personality disorder, with no correlation between self-reports of normal personality and self-reports of personality disorder) (3) a third model with correlation between same-methods across domains (e.g., self-reports of normal personality were allowed to correlate with self-reports of personality disorder), but not between self-reports and informant-reports within the same domain, and (4) a fourth model with correlation between same-methods across domains and with correlation of self- and informant-reports within domains (e.g., self- and informant-reports of normal personality were allowed to correlate. Models 3 and 4 fit the data best. Model 3 was chosen because the correlations specified between self- and informant reports in the same domain were small. Model 3 is depicted in Figure 2 of the manuscript.

Study 2 model fit indices using second-order hierarchical and single-factor extraction methods of the general factors:

Model fit indices for Study 2 2<sup>nd</sup> order hierarchical version of the model:

RMSEA = .069 (90% CI = .068, .070), SRMR = .107, CFI = .678, TLI = .659,  $df = 3791$ ,  $\chi^2 = 22090.159$ ,  $p < .001$ , AIC = 87614.690, BIC = 89555.761

*Note.* In this model, the GFP was extracted from the lower order N, E, O, A, and C factors (i.e., 5 latent variables), and the g-PD was extracted from the lower-order MAPP (self and informant) and SIDP (cluster A and cluster B) factors (i.e., 4 latent indicators), along with the cluster C indicators (i.e., nine observed indicators).

Model fit indices for Study 2 single-factor version of the model:

RMSEA = .086 (90% CI = .085, .087), SRMR = .161, CFI = .490, TLI = .464,  $df = 3814$ ,  $\chi^2 = 32765.954$ ,  $p < .001$ , AIC = 98619.987, BIC = 100447.747

*Note.* In this model, the GFP was extracted directly from the self and informant NEO facet indicators (i.e., 60 observed indicators), and the g-PD was extracted directly from the self, informant, and interview DSM PD indicators (i.e., 36 observed indicators).



## GENERAL FACTORS

|        |        |        |        |       |
|--------|--------|--------|--------|-------|
| PNEOO1 | -0.056 | 0.373  |        | 0.46  |
| PNEOO2 | 0.182  | 0.392  |        | 0.561 |
| PNEOO3 | 0.104  | 0.591  |        | 0.412 |
| PNEOO4 | 0.285  | 0.245  |        | 0.392 |
| PNEOO5 | 0.293  | 0.343  |        | 0.402 |
| PNEOO6 | 0.203  | 0.188  |        | 0.412 |
| INEOO1 | -0.035 |        | -0.144 | 0.583 |
| INEOO2 | 0.083  |        | 0.125  | 0.752 |
| INEOO3 | 0.053  |        | 0.078  | 0.575 |
| INEOO4 | 0.13   |        | 0.212  | 0.482 |
| INEOO5 | 0.15   |        | 0.232  | 0.535 |
| INEOO6 | 0.113  |        | 0.258  | 0.392 |
| PNEOA1 | 0.517  | 0.179  |        | 0.362 |
| PNEOA2 | 0.187  | -0.104 |        | 0.614 |
| PNEOA3 | 0.426  | 0.274  |        | 0.552 |
| PNEOA4 | 0.259  | -0.099 |        | 0.59  |
| PNEOA5 | -0.1   | -0.126 |        | 0.546 |
| PNEOA6 | 0.159  | 0.237  |        | 0.547 |
| INEOA1 | 0.292  |        | 0.619  | 0.123 |
| INEOA2 | 0.029  |        | 0.696  | 0.161 |
| INEOA3 | 0.18   |        | 0.784  | 0.183 |
| INEOA4 | 0.142  |        | 0.694  | 0.16  |
| INEOA5 | -0.055 |        | 0.607  | 0.235 |
| INEOA6 | 0.066  |        | 0.526  | 0.284 |
| PNEOC1 | 0.717  | 0.202  |        | 0.189 |
| PNEOC2 | 0.365  | 0.104  |        | 0.375 |
| PNEOC3 | 0.526  | 0.156  |        | 0.219 |
| PNEOC4 | 0.487  | 0.3    |        | 0.286 |
| PNEOC5 | 0.642  | 0.093  |        | 0.312 |



GENERAL FACTORS

|         |       |        |       |       |        |
|---------|-------|--------|-------|-------|--------|
| PNEOC6  | 0.434 | -0.128 | 0.138 |       |        |
| INEOC1  | 0.292 | 0.556  | 0.534 |       |        |
| INEOC2  | 0.163 | 0.249  | 0.67  |       |        |
| INEOC3  | 0.241 | 0.624  | 0.521 |       |        |
| INEOC4  | 0.281 | 0.347  | 0.697 |       |        |
| INEOC5  | 0.274 | 0.498  | 0.699 |       |        |
| INEOC6  | 0.167 | 0.575  | 0.44  |       |        |
| PMAPPSZ |       |        | 0.439 | 0.259 |        |
| PMAPPST |       |        | 0.531 | 0.554 |        |
| PMAPPPA |       |        | 0.521 | 0.57  |        |
| PMAPPAS |       |        | 0.319 | 0.546 |        |
| PMAPPBD |       |        | 0.619 | 0.539 |        |
| PMAPPHS |       |        | 0.282 | 0.725 |        |
| PMAPPNA |       |        | 0.217 | 0.765 |        |
| PMAPPAV |       |        | 0.696 | 0.317 |        |
| PMAPPDP |       |        | 0.613 | 0.409 |        |
| PMAPPOC |       |        | 0.305 | 0.597 |        |
| IMAPPSZ |       |        | 0.19  | 0.512 |        |
| IMAPPST |       |        | 0.226 | 0.801 |        |
| IMAPPPA |       |        | 0.187 | 0.795 |        |
| IMAPPAS |       |        | 0.15  | 0.778 |        |
| IMAPPBD |       |        | 0.276 | 0.839 |        |
| IMAPPHS |       |        | 0.109 | 0.807 |        |
| IMAPPNA |       |        | 0.072 | 0.844 |        |
| IMAPPAV |       |        | 0.306 | 0.627 |        |
| IMAPPDP |       |        | 0.25  | 0.691 |        |
| IMAPPOC |       |        | 0.08  | 0.55  |        |
| SIDPSZ  |       |        | 0.345 |       | -0.512 |
| SIDPST  |       |        | 0.382 |       | -0.781 |

## GENERAL FACTORS

54

|        |        |        |       |
|--------|--------|--------|-------|
| SIDPPA | 0.344  | -0.452 |       |
| SIDPAS | 0.175  |        | 0.398 |
| SIDPBD | 0.559  |        | 0.469 |
| SIDPHS | -0.011 |        | 0.57  |
| SIDPNA | 0.052  |        | 0.484 |
| SIDPAV | 0.649  |        |       |
| SIDPDP | 0.497  |        |       |
| SIDPOC | 0.34   |        |       |

---

*Note.* Loadings  $p < .001$  bold,  $p < .01$  underlined, and  $p < .05$  italicized. P = participant, I = informant. MAPP = Multi-Source Assessment of Personality Pathology, SIDP = Structured Interview for DSM-IV Personality, SZ = schizoid, ST = schizotypal, PA = paranoid, AS = antisocial, BD = borderline, HS = histrionic, NA = narcissistic, AV = avoidant, DP = dependent, OC = obsessive-compulsive. This model is displayed in Figure 2 of the manuscript. Analysis conducted with the lavaan package in R software. MLR estimation was used.

GENERAL FACTORS

Table 12. Study 2 Combined Multi-Method GFP/g-PD Model Latent Correlations.

| latentvar1 | cor | latentvar2 | r      | se    | z       | p     |
|------------|-----|------------|--------|-------|---------|-------|
| PFU5MAPPSZ | ~~  | IFU5MAPPSZ | 0.181  | 0.034 | 5.3     | 0     |
| PFU5MAPPST | ~~  | IFU5MAPPST | 0.197  | 0.035 | 5.555   | 0     |
| PFU5MAPPPA | ~~  | IFU5MAPPPA | 0.257  | 0.037 | 7.004   | 0     |
| PFU5MAPPAS | ~~  | IFU5MAPPAS | 0.251  | 0.035 | 7.147   | 0     |
| PFU5MAPPBD | ~~  | IFU5MAPPBD | 0.129  | 0.046 | 2.819   | 0.005 |
| PFU5MAPPHS | ~~  | IFU5MAPPHS | 0.283  | 0.041 | 6.871   | 0     |
| PFU5MAPPNA | ~~  | IFU5MAPPNA | 0.123  | 0.047 | 2.582   | 0.01  |
| PFU5MAPPAV | ~~  | IFU5MAPPAV | 0.248  | 0.041 | 6.131   | 0     |
| PFU5MAPPDP | ~~  | IFU5MAPPDP | 0.271  | 0.038 | 7.122   | 0     |
| PFU5MAPPOC | ~~  | IFU5MAPPOC | 0.256  | 0.033 | 7.701   | 0     |
| GFP        | ~~  | gPD        | -0.816 | 0.03  | -27.594 | 0     |
| N          | ~~  | SIDPA      | 0.147  | 0.048 | 3.062   | 0.002 |
| E          | ~~  | SIDPA      | 0.172  | 0.075 | 2.301   | 0.021 |
| N          | ~~  | SIDPB      | 0.132  | 0.058 | 2.256   | 0.024 |
| E          | ~~  | SIDPB      | 0.35   | 0.047 | 7.425   | 0     |
| A          | ~~  | SIDPB      | -0.349 | 0.075 | -4.66   | 0     |
| C          | ~~  | SIDPB      | 0.012  | 0.05  | 0.229   | 0.819 |
| IR         | ~~  | IMAPP      | -0.723 | 0.024 | -30.044 | 0     |
| SR         | ~~  | PMAPP      | 0.324  | 0.12  | 2.693   | 0.007 |
| PFU5NEON1  | ~~  | IFU5NEON1  | 0.383  | 0.042 | 9.063   | 0     |
| PFU5NEON2  | ~~  | IFU5NEON2  | 0.346  | 0.037 | 9.281   | 0     |
| PFU5NEON3  | ~~  | IFU5NEON3  | 0.275  | 0.047 | 5.797   | 0     |
| PFU5NEON4  | ~~  | IFU5NEON4  | 0.248  | 0.037 | 6.749   | 0     |
| PFU5NEON5  | ~~  | IFU5NEON5  | 0.376  | 0.03  | 12.678  | 0     |
| PFU5NEON6  | ~~  | IFU5NEON6  | 0.228  | 0.05  | 4.55    | 0     |
| PFU5NEOE1  | ~~  | IFU5NEOE1  | 0.311  | 0.04  | 7.777   | 0     |

## GENERAL FACTORS

|           |    |           |       |       |        |       |
|-----------|----|-----------|-------|-------|--------|-------|
| PFU5NEOE2 | ~~ | IFU5NEOE2 | 0.357 | 0.049 | 7.226  | 0     |
| PFU5NEOE3 | ~~ | IFU5NEOE3 | 0.451 | 0.03  | 14.878 | 0     |
| PFU5NEOE4 | ~~ | IFU5NEOE4 | 0.405 | 0.031 | 13.059 | 0     |
| PFU5NEOE5 | ~~ | IFU5NEOE5 | 0.492 | 0.031 | 16.097 | 0     |
| PFU5NEOE6 | ~~ | IFU5NEOE6 | 0.319 | 0.036 | 8.877  | 0     |
| PFU5NEOO1 | ~~ | IFU5NEOO1 | 0.181 | 0.036 | 5.047  | 0     |
| PFU5NEOO2 | ~~ | IFU5NEOO2 | 0.231 | 0.052 | 4.442  | 0     |
| PFU5NEOO3 | ~~ | IFU5NEOO3 | 0.241 | 0.038 | 6.414  | 0     |
| PFU5NEOO4 | ~~ | IFU5NEOO4 | 0.298 | 0.032 | 9.446  | 0     |
| PFU5NEOO5 | ~~ | IFU5NEOO5 | 0.418 | 0.033 | 12.776 | 0     |
| PFU5NEOO6 | ~~ | IFU5NEOO6 | 0.508 | 0.025 | 20.36  | 0     |
| PFU5NEOA1 | ~~ | IFU5NEOA1 | 0.282 | 0.035 | 8.072  | 0     |
| PFU5NEOA2 | ~~ | IFU5NEOA2 | 0.142 | 0.041 | 3.413  | 0.001 |
| PFU5NEOA3 | ~~ | IFU5NEOA3 | 0.239 | 0.04  | 5.94   | 0     |
| PFU5NEOA4 | ~~ | IFU5NEOA4 | 0.285 | 0.04  | 7.078  | 0     |
| PFU5NEOA5 | ~~ | IFU5NEOA5 | 0.189 | 0.037 | 5.032  | 0     |
| PFU5NEOA6 | ~~ | IFU5NEOA6 | 0.307 | 0.034 | 9.072  | 0     |
| PFU5NEOC1 | ~~ | IFU5NEOC1 | 0.192 | 0.035 | 5.479  | 0     |
| PFU5NEOC2 | ~~ | IFU5NEOC2 | 0.379 | 0.042 | 9.03   | 0     |
| PFU5NEOC3 | ~~ | IFU5NEOC3 | 0.197 | 0.038 | 5.132  | 0     |
| PFU5NEOC4 | ~~ | IFU5NEOC4 | 0.203 | 0.053 | 3.801  | 0     |
| PFU5NEOC5 | ~~ | IFU5NEOC5 | 0.172 | 0.068 | 2.544  | 0.011 |
| PFU5NEOC6 | ~~ | IFU5NEOC6 | 0.211 | 0.033 | 6.331  | 0     |

*Note.* I = informant, P = target participant.

## References

- Bastien, C. H., Vallières, A., & Morin, C. M. (2001). Validation of the Insomnia Severity Index as an outcome measure for insomnia research. *Sleep Medicine, 2*, 297-307.
- Bauer, M. S., Crits-Christoph, P., Ball, W. A., Dewees, E., McAllister, T., Alahi, P., ... & Whybrow, P. C. (1991). Independent assessment of manic and depressive symptoms by self-rating: Scale characteristics and implications for the study of mania. *Archives of General Psychiatry, 48*, 807-812.
- Benet-Martinez, V., & John, O. P. (1998). Los Cinco Grandes across cultures and ethnic groups: Multitrait-multimethod analyses of the Big Five in Spanish and English. *Journal of Personality and Social Psychology, 75*, 729-750.
- Bieling, P. J., Antony, M. M., & Swinson, R. P., (1998). The State-Trait Anxiety Inventory, Trait Version: Structure and content re-examined. *Behaviour Research and Therapy, 36*, 777-788.
- Derogatis, L. R., & Melisaratos, N. (1983). The Brief Symptom Inventory: An introductory report. *Psychological Medicine, 13*, 595-605.
- Costa, P. T., & McCrae, R. R. (1992). *Revised NEO Personality Inventory (NEO PI-R) and NEO Five-Factor Inventory (NEO-FFI) professional manual*. Odessa, FL: Psychological Assessment Resources.
- Diener, E. D., Emmons, R. A., Larsen, R. J., & Griffin, S. (1985). The satisfaction with life scale. *Journal of Personality Assessment, 49*, 71-75.
- Dinno, A. (2012). paran: Horn's test of principal components/factors. R package version 1.5.1. Retrieved from <http://CRAN.R-project.org/package=paran>
- Enders, C. K. (2006). A primer on the use of modern missing-data methods in psychosomatic medicine research. *Psychosomatic Medicine, 68*, 427-436.

- Hays, R. D., & Morales, L. S. (2001). The RAND-36 measure of health-related quality of life. *Annals of Medicine, 33*, 350-357.
- Heatherston, T. F., Kozlowski, L. T., Frecker, R. C., & Fagerström, K. O. (1991). The Fagerström test for nicotine dependence: a revision of the Fagerström Tolerance Questionnaire. *British Journal of Addiction, 86*, 1119-1127.
- Krueger, R. F., Derringer, J., Markon, K. F., Watson, D., & Skodol, A. E. (2012). Initial construction of a maladaptive personality trait model and inventory for DSM-5. *Psychological Medicine, 42*, 1879–1890.
- Lang, F. R., & Carstensen, L. L. (1994). Close emotional relationships in late life: Further support for proactive aging in the social domain. *Psychology and Aging, 9*, 315-324.
- Maples, J. L., Guan, L., Carter, N. T., & Miller, J. D. (2014). A test of the International Personality Item Pool representation of the Revised NEO Personality Inventory and development of a 120-item IPIP-based measure of the five factor model. *Psychological Assessment, 26*, 1070-1084.
- Marks, I. M., & Mathews, A. M. (1979). Brief standard self-rating for phobic patients. *Behaviour Research and Therapy, 17*, 263-267.
- Martin, G., Copeland, J., Gates, P., & Gilmour, S. (2006). The Severity of Dependence Scale (SDS) in an adolescent population of cannabis users: Reliability, validity and diagnostic cut-off. *Drug and Alcohol Dependence, 83*, 90-93.
- McCabe, S. E., Boyd, C. J., Cranford, J. A., Morales, M., & Slayden, J. (2006). A modified version of the Drug Abuse Screening Test among undergraduate students. *Journal of Substance Abuse Treatment, 31*, 297-303.

- Morin, C. M., Belleville, G., Belanger, L., & Ivers, H. (2011). The Insomnia Severity Index: Psychometric indicators to detect insomnia cases and evaluate treatment response. *SLEEP, 34*, 601–608.
- O'Connor, B. (2017). paramap: Factor analysis functions for assessing dimensionality. R package version 1.3. Retrieved from <https://people.ok.ubc.ca/briocconn/nfactors/paramap.pdf>
- Oltmanns, T. F., Rodrigues, M. M., Weinstein, Y., & Gleason, M. E. (2014). Prevalence of personality disorders at midlife in a community sample: Disorders and symptoms reflected in interview, self, and informant reports. *Journal of Psychopathology and Behavioral Assessment, 36*, 177-188.
- Oltmanns, T. F., & Turkheimer, E. (2006). Perceptions of self and others regarding pathological personality traits. In R. F. Krueger and J. L. Tackett (Eds.), *Personality and psychopathology* (pp. 71-111). New York: Guilford.
- Peters, E. R., Joseph, S. A., & Garety, P. A. (1999). Measurement of delusional ideation in the normal population: Introducing the PDI (Peters et al. Delusions Inventory). *Schizophrenia Bulletin, 25*, 553-576.
- Pierce, G. R., Sarason, I. G., & Sarason, B. R. (1991). General and relationship-based perceptions of social support: Are two constructs better than one? *Journal of Personality and Social Psychology, 61*, 1028–1039.
- Pfohl, B., Blum, N., & Zimmerman, M. (1997). *Structured interview for DSM-IV personality: SIDP-IV*. American Psychiatric Press.
- Rojas, S. R., & Widiger, T. A. (2014). Convergent and discriminant validity of the Five Factor Form. *Assessment, 2*, 143-157.

## GENERAL FACTORS

60

Russell, D. W. (1996). UCLA Loneliness Scale (Version 3): Reliability, validity, and factor structure. *Journal of Personality Assessment, 66*, 20-40.

Samuel, D. B., & Widiger, T. A. (2008). A meta-analytic review of the relationships between the five-factor model and DSM-IV-TR personality disorders: A facet level analysis. *Clinical Psychology Review, 28*, 1326-1342.

Saunders, J. B., Aasland, O. G., Babor, T. F., De la Fuente, J. R., & Grant, M. (1993). Development of the alcohol use disorders identification test (AUDIT): WHO collaborative project on early detection of persons with harmful alcohol consumption-II. *Addiction, 88*, 791-804.
